# Supplementary material for: Conservation and Dispersion of Genes Conferring Resistance to Tomato Begomoviruses between Tomato and Pepper Genomes
Source: PubMed Central journal article supplement (PMC5681951; doi:10.3389/fpls.2017.01803), 2017-11-07
Supplement: Table2.pdf [file Table2.pdf]

**Table S6. Annotation of genes in *Ty1* qtl region of Tomato and their conserved orthologs in pepper**

| S. No | Tomato Gene      | Annotation in Tomato                                                | Pepper Ortholog | Annotation in Pepper                                                   |
|-------|------------------|---------------------------------------------------------------------|-----------------|------------------------------------------------------------------------|
| 1.    | Solyc06g034130.2 | LATE EMBRYOGENESIS ABUNDANT PROTEIN-LIKE PROTEIN                    | -               | -                                                                      |
| 2.    | Solyc06g034140.1 | B3 DNA binding domain (B3 // Protein of unknown function (DUF724)   | capana06g002534 | SINA3_ARATH E3 ubiquitin-protein ligase                                |
| 3.    | Solyc06g034150.2 | 8-amino-7-oxononanoate synthase / AONS                              | capana06g002538 | NUDC_MOUSE Nuclear migration protein                                   |
| 4.    | Solyc06g034160.2 | ubiquitin-like-conjugating enzyme ATG3 (ATG3                        | capana06g002539 | KPYK_CLOAB Pyruvate kinase                                             |
| 5.    | Solyc06g034170.1 | ACYL-[ACYL-CARRIER-PROTEIN] DESATURASE 6, CHLOROPLASTIC             |                 | #N/A                                                                   |
| 6.    | Solyc06g034180.1 | AAA domain (AAA_17                                                  | capana06g002547 | FOLC_BACSU Folylpolyglutamate synthase                                 |
| 7.    | Solyc06g034190.1 | Unknown Protein (AHRD V1)                                           |                 | #N/A                                                                   |
| 8.    | Solyc06g034200.1 | MFS transporter, PHS family, inorganic phosphate transporter (PHO84 |                 | #N/A                                                                   |
| 9.    | Solyc06g034210.1 | Unknown Protein (AHRD V1)                                           |                 | #N/A                                                                   |
| 10.   | Solyc06g034220.2 | VESICLE-ASSOCIATED PROTEIN 1-1-RELATED                              | capana06g002527 | Y3475_ARATH Probable LRR receptor-like serine/threonine-protein kinase |
| 11.   | Solyc06g034230.1 | F14O23.23 PROTEIN                                                   |                 | #N/A                                                                   |
| 12.   | Solyc06g034250.1 | Unknown Protein (AHRD V1)                                           |                 | #N/A                                                                   |
| 13.   | Solyc06g034260.1 | F-box protein At2g35280 (AHRD V1 *-*-FB127 ARATH)                   |                 | #N/A                                                                   |
| 14.   | Solyc06g034290.2 | GLYCEROL-3-PHOSPHATE TRANSPORTER 4-RELATED                          |                 | #N/A                                                                   |
| 15.   | Solyc06g034300.1 | Unknown Protein (AHRD V1)                                           |                 | #N/A                                                                   |

|     |                  |                                                                                                 |                 |                                                                     |
|-----|------------------|-------------------------------------------------------------------------------------------------|-----------------|---------------------------------------------------------------------|
| 16. | Solyc06g034310.2 | DDE superfamily endonuclease<br>(DDE_Tnp_4)                                                     |                 | #N/A                                                                |
| 17. | Solyc06g034320.1 | Domain of unknown function (DUF4535)                                                            |                 | #N/A                                                                |
| 18. | Solyc06g034330.2 | autocrine motility factor receptor (AMFR,<br>GP78)                                              | capana06g002522 | FAD3E_TOBAC Omega-3<br>fatty acid desaturase                        |
| 19. | Solyc06g034340.1 | No apical meristem (NAM protein)                                                                | capana06g002524 | PLCD4_ARATH<br>Phosphoinositide phospholipase                       |
| 20. | Solyc06g034350.1 | Unknown Protein (AHRD V1)                                                                       |                 | #N/A                                                                |
| 21. | Solyc06g034360.1 | PECTINESTERASE/PECTINESTERASE<br>INHIBITOR 33-RELATED                                           | capana06g002526 | FLS2_ARATH LRR receptor-<br>like serine/threonine-protein<br>kinase |
| 22. | Solyc06g034370.1 | INVERTASE/PECTIN<br>METHYLESTERASE INHIBITOR<br>FAMILY PROTEIN / DC 1.2-LIKE<br>PROTEIN-RELATED |                 | #N/A                                                                |
| 23. | Solyc06g034380.1 | 60S/50S RIBOSOMAL PROTEIN L6/L9<br>// SUBFAMILY NOT NAMED                                       |                 | #N/A                                                                |
| 24. | Solyc06g034390.1 | Phosphate-induced protein 1 conserved<br>region (Phi_1)                                         |                 | #N/A                                                                |
| 25. | Solyc06g034400.1 | Unknown Protein (AHRD V1)                                                                       |                 | #N/A                                                                |
| 26. | Solyc06g034410.2 | Protein of unknown function (DUF1442)                                                           |                 | #N/A                                                                |
| 27. | Solyc06g035410.1 | PURINE PERMEASE 1-RELATED                                                                       |                 | #N/A                                                                |
| 28. | Solyc06g035420.1 | PURINE PERMEASE 1-RELATED                                                                       |                 | #N/A                                                                |
| 29. | Solyc06g035430.2 | AT HOOK MOTIF DNA-BINDING<br>FAMILY PROTEIN-RELATED                                             |                 | #N/A                                                                |
| 30. | Solyc06g035440.2 | TARGETING PROTEIN FOR XKLP2 //<br>SUBFAMILY NOT NAMED                                           |                 | #N/A                                                                |
| 31. | Solyc06g035450.2 | DEAD-BOX ATP-DEPENDENT RNA<br>HELICASE 7                                                        |                 | #N/A                                                                |
| 32. | Solyc06g035460.2 | DEAD-BOX ATP-DEPENDENT RNA<br>HELICASE 7                                                        |                 | #N/A                                                                |

|     |                  |                                                                   |                 |                                               |
|-----|------------------|-------------------------------------------------------------------|-----------------|-----------------------------------------------|
| 33. | Solyc06g035470.1 | MuDR family transposase                                           |                 | #N/A                                          |
| 34. | Solyc06g035480.2 | EPIDIDYMAL MEMBRANE PROTEIN E9-RELATED // SUBFAMILY NOT NAMED     |                 | #N/A                                          |
| 35. | Solyc06g035490.2 | TRANSCRIPTION FACTOR BHLH118-RELATED                              |                 | #N/A                                          |
| 36. | Solyc06g035500.1 | Unknown Protein (AHRD V1)                                         |                 | #N/A                                          |
| 37. | Solyc06g035510.1 | Unknown Protein (AHRD V1)                                         |                 | #N/A                                          |
| 38. | Solyc06g035520.2 | CARBOXYLESTERASE 120-RELATED                                      |                 | #N/A                                          |
| 39. | Solyc06g035530.2 | gibberellin 20-oxidase (E1.14.11.12)                              |                 | #N/A                                          |
| 40. | Solyc06g035540.1 | Unknown Protein (AHRD V1)                                         |                 | #N/A                                          |
| 41. | Solyc06g035550.2 | Unknown Protein (AHRD V1)                                         |                 | #N/A                                          |
| 42. | Solyc06g035560.1 | Unknown Protein (AHRD V1)                                         |                 | #N/A                                          |
| 43. | Solyc06g035570.1 | MADS BOX PROTEIN                                                  |                 | #N/A                                          |
| 44. | Solyc06g035580.2 | GLUCOSE-METHANOL-CHOLINE (GMC)                                    | capana01g000403 | #N/A                                          |
| 45. | Solyc06g035590.1 | Unknown Protein (AHRD V1)                                         |                 | #N/A                                          |
| 46. | Solyc06g035600.2 | PPR repeat (PPR // Ribosomal Proteins L2, C-terminal domain)      | capana01g000397 | PHR_ARATH<br>Deoxyribodipyrimidine photolyase |
| 47. | Solyc06g035610.2 | RNA recognition motif. (a.k.a. RRM, RBD, or RNP domain (RRM_1))   |                 | #N/A                                          |
| 48. | Solyc06g035620.2 | GRAS domain family (GRAS)                                         |                 | #N/A                                          |
| 49. | Solyc06g035630.1 | Unknown Protein (AHRD V1)                                         |                 | #N/A                                          |
| 50. | Solyc06g035640.1 | GAG-POL-RELATED RETROTRANSPOSON // SUBFAMILY NOT NAMED            |                 | #N/A                                          |
| 51. | Solyc06g035650.1 | Unknown Protein (AHRD V1)                                         |                 | #N/A                                          |
| 52. | Solyc06g035660.1 | Ulp1 protease family, C-terminal catalytic domain (Peptidase_C48) |                 | #N/A                                          |
| 53. | Solyc06g035670.1 | Unknown Protein (AHRD V1)                                         |                 | #N/A                                          |

|     |                  |                                                                                       |                 |                                                                   |
|-----|------------------|---------------------------------------------------------------------------------------|-----------------|-------------------------------------------------------------------|
| 54. | Solyc06g035680.1 | Sorbitol-6-phosphate 2-dehydrogenase /<br>Ketosephosphate reductase                   |                 | #N/A                                                              |
| 55. | Solyc06g035690.2 | PER1-RELATED                                                                          | capana03g002393 | PGAP3_XENTR Post-GPI<br>attachment to proteins factor 3           |
| 56. | Solyc06g035700.1 | ETHYLENE-RESPONSIVE<br>TRANSCRIPTION FACTOR ERF025-<br>RELATED                        | capana03g002388 | DRE1C_ARATH Dehydration-<br>responsive element-binding<br>protein |
| 57. | Solyc06g035710.1 | MATE EFFLUX FAMILY PROTEIN                                                            | capana01g000327 | YD338_YEAST<br>Uncharacterized transporter<br>YDR338C             |
| 58. | Solyc06g035720.2 | BAG FAMILY MOLECULAR<br>CHAPERONE REGULATOR 2-<br>RELATED                             | capana01g000326 | BAG1_ARATH BAG family<br>molecular chaperone regulator            |
| 59. | Solyc06g035740.1 | SWIM zinc finger (SWIM // MULE<br>transposase domain (MULE))                          | capana03g002469 | FUCO1_ARATH Alpha-L-<br>fucosidase                                |
| 60. | Solyc06g035750.1 | Unknown Protein (AHRD V1)                                                             |                 | #N/A                                                              |
| 61. | Solyc06g035760.2 | CYTOCHROME P450<br>MONOOXYGENASE-LIKE PROTEIN                                         | capana01g000367 | C93A2_SOYBN Cytochrome<br>P450 93A2                               |
| 62. | Solyc06g035770.1 | Unknown Protein (AHRD V1)                                                             |                 | #N/A                                                              |
| 63. | Solyc06g035790.2 | METHYLTRANSFERASE //<br>SUBFAMILY NOT NAMED                                           |                 | #N/A                                                              |
| 64. | Solyc06g035800.1 | Unknown Protein (AHRD V1)                                                             |                 | #N/A                                                              |
| 65. | Solyc06g035810.1 | Putative S-adenosyl-L-methionine-<br>dependent methyltransferase<br>(Methyltransf_29) |                 | #N/A                                                              |
| 66. | Solyc06g035820.1 | PROTEASE INHIBITOR/SEED<br>STORAGE/LIPID TRANSFER<br>PROTEIN (LTP FAMILY PROTEIN)     |                 | #N/A                                                              |
| 67. | Solyc06g035830.1 | Unknown Protein (AHRD V1)                                                             |                 | #N/A                                                              |
| 68. | Solyc06g035840.1 | Unknown Protein (AHRD V1)                                                             |                 | #N/A                                                              |
| 69. | Solyc06g035850.1 | Unknown Protein (AHRD V1)                                                             |                 | #N/A                                                              |

|     |                  |                                                               |  |      |
|-----|------------------|---------------------------------------------------------------|--|------|
| 70. | Solyc06g035860.1 | Unknown Protein (AHRD V1)                                     |  | #N/A |
| 71. | Solyc06g035870.2 | MEMBRANE STEROID-BINDING<br>PROTEIN 1-RELATED                 |  | #N/A |
| 72. | Solyc06g035880.1 | HOMEBOX-LEUCINE ZIPPER<br>PROTEIN HDG7                        |  | #N/A |
| 73. | Solyc06g035890.1 | Unknown Protein (AHRD V1)                                     |  | #N/A |
| 74. | Solyc06g035900.1 | REMORIN FAMILY PROTEIN-<br>RELATED                            |  | #N/A |
| 75. | Solyc06g035910.1 | Remorin, C-terminal region (Remorin_C                         |  | #N/A |
| 76. | Solyc06g035920.2 | Remorin, N-terminal region (Remorin_N                         |  | #N/A |
| 77. | Solyc06g035930.1 | Unknown Protein (AHRD V1)                                     |  | #N/A |
| 78. | Solyc06g035940.2 | homeobox-leucine zipper protein (HD-ZIP                       |  | #N/A |
| 79. | Solyc06g035960.2 | Oxalate--CoA ligase / Oxalyl-CoA<br>synthetase                |  | #N/A |
| 80. | Solyc06g035970.2 | TUBULIN // SUBFAMILY NOT<br>NAMED                             |  | #N/A |
| 81. | Solyc06g035980.2 | ACTIN-DEPOLYMERIZING FACTOR<br>10-RELATED                     |  | #N/A |
| 82. | Solyc06g035990.2 | RNA POLYMERASE III DNA<br>DIRECTED -RELATED                   |  | #N/A |
| 83. | Solyc06g036000.2 | DNA-directed RNA polymerase III<br>subunit RPC3 (RPC3, POLR3C |  | #N/A |
| 84. | Solyc06g036010.1 | 0                                                             |  | #N/A |
| 85. | Solyc06g036020.1 | 0                                                             |  | #N/A |
| 86. | Solyc06g036030.1 | 0                                                             |  | #N/A |
| 87. | Solyc06g036040.1 | 0                                                             |  | #N/A |
| 88. | Solyc06g036050.2 | Large subunit ribosomal protein L36e<br>(RP-L36e, RPL36       |  | #N/A |
| 89. | Solyc06g036060.2 | C2H2-LIKE ZINC FINGER PROTEIN                                 |  | #N/A |
| 90. | Solyc06g036070.2 | SKP1-LIKE PROTEIN 20-RELATED                                  |  | #N/A |
| 91. | Solyc06g036080.2 | MITOGEN-ACTIVATED KINASE<br>KINASE KINASE // SUBFAMILY NOT    |  | #N/A |

|      |                  | NAMED                                                            |                 |                                            |
|------|------------------|------------------------------------------------------------------|-----------------|--------------------------------------------|
| 92.  | Solyc06g036090.1 | Unknown Protein (AHRD V1)                                        |                 | #N/A                                       |
| 93.  | Solyc06g036100.2 | Sodium sulfate symporter and related arsenite permeases          |                 | #N/A                                       |
| 94.  | Solyc06g036110.1 | C2 domain                                                        |                 | #N/A                                       |
| 95.  | Solyc06g036120.2 | Unknown Protein (AHRD V1)                                        |                 | #N/A                                       |
| 96.  | Solyc06g036130.2 | MATE EFFLUX FAMILY PROTEIN                                       | capana03g002183 | TT12_ARATH Protein<br>TRANSPARENT TESTA 12 |
| 97.  | Solyc06g036140.1 | RNA-directed DNA polymerase /<br>Revertase                       |                 | #N/A                                       |
| 98.  | Solyc06g036150.1 | SENTRIN/SUMO-SPECIFIC<br>PROTEASE // SUBFAMILY NOT<br>NAMED      |                 | #N/A                                       |
| 99.  | Solyc06g036170.1 | SCARECROW-LIKE PROTEIN 8                                         | capana03g002179 | SCL8_ARATH Scarecrow-like<br>protein       |
| 100. | Solyc06g036180.2 | Unknown Protein (AHRD V1)                                        |                 | #N/A                                       |
| 101. | Solyc06g036190.1 | MITOGEN-ACTIVATED PROTEIN<br>KINASE KINASE KINASE 19-<br>RELATED |                 | #N/A                                       |
| 102. | Solyc06g036200.1 | TRANSCRIPTION INITIATION<br>FACTOR TFIID/SUPT3-RELATED           |                 | #N/A                                       |
| 103. | Solyc06g036210.1 | NAD(PH)-QUINONE<br>OXIDOREDUCTASE SUBUNIT K,<br>CHLOROPLASTIC    |                 | #N/A                                       |
| 104. | Solyc06g036220.1 | NADPH OXIDASE // SUBFAMILY<br>NOT NAMED                          | capana03g002234 | KIF22_PONAB Kinesin-like<br>protein        |
| 105. | Solyc06g036230.2 | Unknown Protein (AHRD V1)                                        |                 | #N/A                                       |
| 106. | Solyc06g036240.1 | ATP-BINDING CASSETTE<br>TRANSPORTER // SUBFAMILY NOT<br>NAMED    |                 | #N/A                                       |
| 107. | Solyc06g036250.1 | Unknown Protein (AHRD V1)                                        |                 | #N/A                                       |

|      |                  |                                                                                      |  |      |
|------|------------------|--------------------------------------------------------------------------------------|--|------|
| 108. | Solyc06g036260.2 | Beta-carotene 3-hydroxylase / Beta-carotene 3,3'-monooxygenase                       |  |      |
| 109. | Solyc06g036270.1 | Ulp1 protease family, C-terminal catalytic domain (Peptidase_C48)                    |  |      |
| 110. | Solyc06g036290.2 | HEAT SHOCK PROTEIN 90 // SUBFAMILY NOT NAMED                                         |  |      |
| 111. | Solyc06g036300.2 | SWI/SNF COMPLEX-RELATED // SUBFAMILY NOT NAMED                                       |  | #N/A |
| 112. | Solyc06g036310.2 | COPPER TRANSPORT FAMILY PROTEIN-RELATED                                              |  |      |
| 113. | Solyc06g036320.1 | Protein-serine/threonine phosphatase / Serine/threonine specific protein phosphatase |  | #N/A |
| 114. | Solyc06g036330.1 | Thiomorpholine-carboxylate dehydrogenase / Ketimine reductase                        |  | #N/A |
| 115. | Solyc06g036340.2 | PENTATRICOPEPTIDE REPEAT-CONTAINING PROTEIN-LIKE PROTEIN                             |  |      |
| 116. | Solyc06g036350.2 | NADH dehydrogenase (ubiquinone 1 alpha subcomplex subunit 5 (NDUFA5))                |  | #N/A |
| 117. | Solyc06g036360.1 | Unknown Protein (AHRD V1)                                                            |  | #N/A |
| 118. | Solyc06g036370.1 | Unknown Protein (AHRD V1)                                                            |  | #N/A |
| 119. | Solyc06g036380.1 | Unknown Protein (AHRD V1)                                                            |  | #N/A |
| 120. | Solyc06g036390.1 | Unknown Protein (AHRD V1)                                                            |  | #N/A |
| 121. | Solyc06g036410.1 | PROTEIN SGT1 HOMOLOG A-RELATED                                                       |  | #N/A |
| 122. | Solyc06g036420.1 | Suppressor of G2 allele of SKP1 (SUGT1, SGT1)                                        |  | #N/A |
| 123. | Solyc06g036430.2 | RETICULON-LIKE PROTEIN B5-RELATED                                                    |  | #N/A |
| 124. | Solyc06g036440.1 | S-TYPE ANION CHANNEL SLAH2-RELATED                                                   |  | #N/A |

|      |                  |                                                                                                    |  |      |
|------|------------------|----------------------------------------------------------------------------------------------------|--|------|
| 125. | Solyc06g036450.1 | ETHYLENE RESPONSE SENSOR 2-RELATED                                                                 |  | #N/A |
| 126. | Solyc06g036460.2 | MEMBRANE-ASSOCIATED KINASE REGULATOR 6-RELATED                                                     |  | #N/A |
| 127. | Solyc06g036470.1 | Protein kinase domain (Pkinase // S-locus glycoprotein domain (S_locus_glycoprotein))              |  | #N/A |
| 128. | Solyc06g036480.1 | ABC TRANSPORTER C FAMILY MEMBER 10                                                                 |  | #N/A |
| 129. | Solyc06g036490.1 | ATP-binding cassette, subfamily C (CFTR/MRP, member 2)                                             |  | #N/A |
| 130. | Solyc06g036500.1 | Unknown Protein (AHRD V1)                                                                          |  | #N/A |
| 131. | Solyc06g036510.1 | Ulp1 protease family, C-terminal catalytic domain (Peptidase_C48)                                  |  | #N/A |
| 132. | Solyc06g036520.1 | Unknown Protein (AHRD V1)                                                                          |  | #N/A |
| 133. | Solyc06g036530.1 | Protein of unknown function (DUF 659)                                                              |  | #N/A |
| 134. | Solyc06g036540.1 | Unknown Protein (AHRD V1)                                                                          |  | #N/A |
| 135. | Solyc06g036550.1 | Unknown Protein (AHRD V1)                                                                          |  | #N/A |
| 136. | Solyc06g036570.1 | Unknown Protein (AHRD V1)                                                                          |  | #N/A |
| 137. | Solyc06g036580.2 | U4/U6 small nuclear ribonucleoprotein PRP3 (PRPF3, PRP3)                                           |  | #N/A |
| 138. | Solyc06g036590.1 | Unknown Protein (AHRD V1)                                                                          |  | #N/A |
| 139. | Solyc06g036600.1 | Alternative splicing factor SRp55/B52/SRp75 (RRM superfamily// Spliceosomal protein snRNP-U1A/U2B) |  | #N/A |
| 140. | Solyc06g036610.1 | KRAB-A DOMAIN-CONTAINING PROTEIN 2                                                                 |  | #N/A |
| 141. | Solyc06g036620.1 | ANKYRIN REPEAT-CONTAINING PROTEIN                                                                  |  | #N/A |
| 142. | Solyc06g036630.1 | ANKYRIN REPEAT-CONTAINING PROTEIN                                                                  |  | #N/A |
| 143. | Solyc06g036640.2 | ALPHA- 1,6 -                                                                                       |  | #N/A |



|      |                  |                                                                                                                    |  |      |
|------|------------------|--------------------------------------------------------------------------------------------------------------------|--|------|
|      |                  | FUCOSYLTRANSFERASE                                                                                                 |  |      |
| 144. | Solyc06g036650.1 | Unknown Protein (AHRD V1)                                                                                          |  | #N/A |
| 145. | Solyc06g036660.1 | Unknown Protein (AHRD V1)                                                                                          |  | #N/A |
| 146. | Solyc06g036670.1 | UNCHARACTERIZED PUTATIVE METHYLTRANSFERASE // SUBFAMILY NOT NAMED                                                  |  | #N/A |
| 147. | Solyc06g036680.1 | Unknown Protein (AHRD V1)                                                                                          |  | #N/A |
| 148. | Solyc06g036690.1 | Unknown Protein (AHRD V1)                                                                                          |  | #N/A |
| 149. | Solyc06g036700.1 | Histone-lysine N-methyltransferase SETD3 [EC:2.1.1.43] (SETD3)                                                     |  | #N/A |
| 150. | Solyc06g036710.1 | Unknown Protein (AHRD V1)                                                                                          |  | #N/A |
| 151. | Solyc06g036720.2 | SCYTHE/BAT3                                                                                                        |  | #N/A |
| 152. | Solyc06g036750.1 | REVERSE TRANSCRIPTASE/RNA-DEPENDENT DNA POLYMERASE-RELATED                                                         |  | #N/A |
| 153. | Solyc06g036770.1 | Unknown Protein (AHRD V1)                                                                                          |  | #N/A |
| 154. | Solyc06g036780.2 | (AHRD V1 *-*- Q0JJY9_ORYSJ); contains Interpro domain(s) IPR000620 Protein of unknown function DUF6, transmembrane |  | #N/A |
| 155. | Solyc06g036790.1 | Unknown Protein (AHRD V1)                                                                                          |  | #N/A |
| 156. | Solyc06g036800.1 | Unknown Protein (AHRD V1)                                                                                          |  | #N/A |
| 157. | Solyc06g036810.1 | Domain of unknown function (DUF4216)                                                                               |  | #N/A |
| 158. | Solyc06g036820.1 | Viral movement protein (MP)                                                                                        |  | #N/A |
| 159. | Solyc06g036850.1 | Unknown Protein (AHRD V1)                                                                                          |  | #N/A |
| 160. | Solyc06g036890.1 | Endonuclease/exonuclease/phosphatase (AHRD V1 *-*- A2Q500_MEDTR)                                                   |  | #N/A |
| 161. | Solyc06g043370.1 | Plant transposase (PttA/En/Spm family (Transposase_24))                                                            |  | #N/A |
| 162. | Solyc06g043360.1 | 3-methyl-2-oxobutanoate dehydrogenase (2-methylpropanoyl-transferring/ Dehydrogenase, branched chain alpha-        |  | #N/A |

|      |                  | keto acid                                                               |  |      |
|------|------------------|-------------------------------------------------------------------------|--|------|
| 163. | Solyc06g043350.1 | Unknown Protein (AHRD V1)                                               |  | #N/A |
| 164. | Solyc06g043340.1 | Unknown Protein (AHRD V1)                                               |  | #N/A |
| 165. | Solyc06g043320.1 | Unknown Protein (AHRD V1)                                               |  | #N/A |
| 166. | Solyc06g043280.1 | Unknown Protein (AHRD V1)                                               |  | #N/A |
| 167. | Solyc06g043270.1 | SKP1 // SUBFAMILY NOT NAMED                                             |  | #N/A |
| 168. | Solyc06g043260.1 | Unknown Protein (AHRD V1)                                               |  | #N/A |
| 169. | Solyc06g043250.2 | Protein kinase domain (Pkinase // Universal stress protein family (Usp) |  | #N/A |
| 170. | Solyc06g043240.1 | Unknown Protein (AHRD V1)                                               |  | #N/A |
| 171. | Solyc06g043230.1 | SWIM zinc finger                                                        |  | #N/A |
| 172. | Solyc06g043210.1 | HECT Ubiquitin (AHRD V1 *-*- Q2HT48_MEDTR)                              |  | #N/A |
| 173. | Solyc06g043180.1 | Ulp1 protease family C-terminal catalytic domain containing protein     |  | #N/A |
| 174. | Solyc06g043170.2 | Actin-related protein 5 (ACTR5, ARP5, INO80M)                           |  | #N/A |
| 175. | Solyc06g043160.1 | PRE-MRNA SPLICING FACTOR PRP8                                           |  | #N/A |

**Table S7. Annotation of genes in *Ty2* qtl region of Tomato and their conserved orthologs in pepper**

| S.No | Tomato gene    | Annotation in Tomato                         | Pepper ortholog | Annotation in Pepper                                  |
|------|----------------|----------------------------------------------|-----------------|-------------------------------------------------------|
| 1.   | Solyc11g069590 | Receptor-like protein kinase                 | capana11g000063 | PERK2_ARATH Proline-rich receptor-like protein kinase |
| 2.   | Solyc11g069600 | Inter-alpha-trypsin inhibitor heavy chain H4 | capana11g000100 | MGP_ARATH Zinc finger protein MAGPIE                  |
| 3.   | Solyc11g069610 | Chromatin remodeling complex subunit         | capana11g000099 | FLA11_ARATH Fasciclin-like                            |

|     |                |                                                                                    |                 |                                                                                          |
|-----|----------------|------------------------------------------------------------------------------------|-----------------|------------------------------------------------------------------------------------------|
|     |                | (AHRD V1 *--- B9N465_POPTR)                                                        |                 | arabinogalactan protein                                                                  |
| 4.  | Solyc11g069620 | Cc-nbs-lrr%2C resistance protein                                                   | capana05g001827 | R13L1_ARATH Putative disease resistance RPP13-like protein                               |
| 5.  | Solyc11g069630 | Receptor-like protein kinase                                                       |                 | #N/A                                                                                     |
| 6.  | Solyc11g069640 | Carbonic anhydrase family protein (                                                | capana11g000062 | NEC3_NICLS Bifunctional monodehydroascorbate reductase and carbonic anhydrase nectarin-3 |
| 7.  | Solyc11g069650 | Unknown Protein (AHRD V1)                                                          |                 | #N/A                                                                                     |
| 8.  | Solyc11g069660 | Nbs-lrr%2C resistance protein                                                      |                 | #N/A                                                                                     |
| 9.  | Solyc11g069670 | Disease resistance protein R3a-like protein (Fragment) (AHRD V1 ***- B3F583_SOLDE) |                 | #N/A                                                                                     |
| 10. | Solyc11g069680 | Acyltransferase-like protein (                                                     |                 | #N/A                                                                                     |
| 11. | Solyc11g069690 | Protein disulfide isomerase                                                        |                 | #N/A                                                                                     |
| 12. | Solyc11g069700 | Elongation factor 1-alpha (IPR004539 Translation elongation factor                 | capana11g000089 | YRDC_RAT YrdC domain-containing protein                                                  |
| 13. | Solyc11g069710 | ABC transporter G family member 3                                                  | capana05g002016 | PM34_DICDI Mitochondrial substrate carrier family protein                                |
| 14. | Solyc11g069720 | 26S protease regulatory subunit 6B homolog                                         | capana05g002005 | DCR_ARATH BAHD acyltransferase                                                           |
| 15. | Solyc11g069730 | Unknown Protein (AHRD V1)                                                          |                 | #N/A                                                                                     |
| 16. | Solyc11g069740 | Nitrate transporter                                                                | capana11g000042 | NRT24_ARATH High affinity nitrate transporter                                            |
| 17. | Solyc11g069750 | Nitrate transporter                                                                |                 | #N/A                                                                                     |
| 18. | Solyc11g069760 | High affinity nitrate transporter protein                                          |                 | #N/A                                                                                     |
| 19. | Solyc11g069770 | Transcription factor MADS                                                          |                 | #N/A                                                                                     |
| 20. | Solyc11g069780 | 2-phosphoglycerate kinase                                                          |                 | #N/A                                                                                     |
| 21. | Solyc11g069790 | chaperonin                                                                         | capana11g000039 | RUBA_PEA RuBisCO large subunit-binding protein subunit alpha                             |
| 22. | Solyc11g069800 | cytochrome P450                                                                    | capana11g000083 | #N/A                                                                                     |
| 23. | Solyc11g069810 | OTU domain containing protein                                                      | capana11g000082 | PIP21_ORYSJ Probable aquaporin                                                           |
| 24. | Solyc11g069820 | ABC transporter G family member 28                                                 | capana05g002017 | #N/A                                                                                     |

|     |                |                                                      |                 |                                                             |
|-----|----------------|------------------------------------------------------|-----------------|-------------------------------------------------------------|
| 25. | Solyc11g069830 | Arsenite ATPase transporter (Eurofung)               |                 | #N/A                                                        |
| 26. | Solyc11g069840 | Os03g0859900 protein                                 | capana11g000091 | C3H24_ARATH Zinc finger CCCH domain-containing protein      |
| 27. | Solyc11g069850 | Telomere repeat-binding protein 4                    | capana11g000092 | #N/A                                                        |
| 28. | Solyc11g069860 | Glutaredoxin                                         | capana11g000093 | FK132_ARATH F-box/kelch-repeat protein                      |
| 29. | Solyc11g069870 | Ripening-related protein 3                           | capana11g000094 | Y0010_DICDI Probable serine/threonine-protein kinase        |
| 30. | Solyc11g069880 | Ripening-related protein 3                           |                 | #N/A                                                        |
| 31. | Solyc11g069890 | BEL1-like homeodomain protein 8                      | capana11g000095 | PDX2_ARATH Pyridoxal biosynthesis protein                   |
| 32. | Solyc11g069900 | Unknown Protein (AHRD V1)                            |                 | #N/A                                                        |
| 33. | Solyc11g069910 | DNA-directed RNA polymerase II subunit J             | capana11g000096 | #N/A                                                        |
| 34. | Solyc11g069920 | Nbs%2C resistance protein fragment                   | capana05g002018 | COI1_ARATH Coronatine-insensitive protein 1                 |
| 35. | Solyc11g069930 | Disease resistance protein R3a-like protein          |                 | #N/A                                                        |
| 36. | Solyc11g069940 | Glutaredoxin                                         | capana05g002010 | DCR_ARATH BAHD acyltransferase SV=1                         |
| 37. | Solyc11g069950 | Cell division protease ftsH homolog                  |                 | #N/A                                                        |
| 38. | Solyc11g069960 | Receptor like kinase%2C RLK                          | capana05g001985 | PT311_ARATH Probable sugar phosphate/phosphate translocator |
| 39. | Solyc11g069970 | Harpin-induced 1                                     | capana05g001984 | SF3_HELAN Pollen-specific protein                           |
| 40. | Solyc11g069980 | Interferon-induced GTP-binding protein Mx (Fragment) | capana05g001983 | Y1500_ARATH Probable tyrosine-protein phosphatase           |
| 41. | Solyc11g069990 | Nbs-lrr%2C resistance protein                        |                 | #N/A                                                        |
| 42. | Solyc11g070000 | Nbs%2C resistance protein fragment                   |                 | #N/A                                                        |
| 43. | Solyc11g070010 | F8A5.6 protein (AHRD V1 ***-- Q9ZP57_ARATH)          |                 | #N/A                                                        |
| 44. | Solyc11g070020 | Unknown Protein (AHRD V1)                            | capana05g001982 | PLCD2_ARATH Phosphoinositide phospholipase                  |
| 45. | Solyc11g070030 | NADH-quinone oxidoreductase subunit B                | capana05g001981 | #N/A                                                        |
| 46. | Solyc11g070040 | Pentatricopeptide repeat-containing protein          | capana05g001980 | G3OX1_ARATH Gibberellin 3-beta-                             |

|     |                |                                                                                      |                 |                                                                        |
|-----|----------------|--------------------------------------------------------------------------------------|-----------------|------------------------------------------------------------------------|
|     |                |                                                                                      |                 | dioxygenase 1                                                          |
| 47. | Solyc11g070050 | DUF866 domain protein                                                                | capana05g001977 | PPIL4_NEUCR Peptidyl-prolyl cis-trans isomerase-like 4                 |
| 48. | Solyc11g070060 | DUF866 domain protein                                                                |                 | #N/A                                                                   |
| 49. | Solyc11g070070 | Zinc finger CCCH domain-containing protein                                           | capana05g001976 | #N/A                                                                   |
| 50. | Solyc11g070080 | Carboxyl-terminal peptidase                                                          | capana05g001941 | SMC6_HUMAN Structural maintenance of chromosomes protein               |
| 51. | Solyc11g070090 | Carboxyl-terminal peptidase                                                          |                 | #N/A                                                                   |
| 52. | Solyc11g070100 | Early flowering 3)                                                                   | capana05g001932 | CXE13_ARATH Probable carboxylesterase                                  |
| 53. | Solyc11g070110 | Epsin                                                                                | capana05g001927 | #N/A                                                                   |
| 54. | Solyc11g070120 | Charged multivesicular body protein                                                  | capana05g001926 | TDR_ARATH Leucine-rich repeat receptor-like protein kinase             |
| 55. | Solyc11g070130 | Profilin                                                                             | capana05g001925 | RFT1_XENTR Protein RFT1 homolog                                        |
| 56. | Solyc11g070140 | Cell division protein kinase 2                                                       | capana05g001918 | PUB35_ARATH U-box domain-containing protein                            |
| 57. | Solyc11g070150 | Histidine phosphotransfer protein                                                    | capana05g001897 | CNR6_MAIZE Cell number regulator 6                                     |
| 58. | Solyc11g070160 | Os06g0483900 protein (Fragment)                                                      | capana05g001891 | CXE1_ACTER Carboxylesterase 1                                          |
| 59. | Solyc11g070170 | Casein kinase I                                                                      | capana05g001886 | GRXS6_ARATH Monothiol glutaredoxin-S6                                  |
| 60. | Solyc11g070180 | Unknown Protein (AHRD V1)                                                            |                 | #N/A                                                                   |
| 61. | Solyc11g070190 | Unknown Protein (AHRD V1)                                                            |                 | #N/A                                                                   |
| 62. | Solyc11g071190 | C3HC4 type zinc-finger domain-containing protein                                     | capana05g001882 | Y4885_ARATH Probable LRR receptor-like serine/threonine-protein kinase |
| 63. | Solyc11g071200 | Unknown Protein (AHRD V1)                                                            | capana05g001880 | #N/A                                                                   |
| 64. | Solyc11g071210 | Unknown Protein (AHRD V1)%3B contains Interpro domain(s) IPR005455 Profilin%2C plant |                 | #N/A                                                                   |
| 65. | Solyc11g071220 | Os05g0596200 protein (Fragment) (AHRD V1 *-*- Q0DFE0_ORYSJ)                          |                 | #N/A                                                                   |

|     |                |                                                                     |                 |                                                                         |
|-----|----------------|---------------------------------------------------------------------|-----------------|-------------------------------------------------------------------------|
| 66. | Solyc11g071230 | Galactosylgalactosylxylosylprotein 3-beta-glucuronosyltransferase 1 | capana11g000020 | IRX9H_ARATH Probable beta-1,4-xylosyltransferase                        |
| 67. | Solyc11g071240 | U-box domain-containing protein                                     | capana11g000079 | REV_ARATH Homeobox-leucine zipper protein                               |
| 68. | Solyc11g071250 | EMBYO FLOWERING 1-like protein                                      | capana11g000018 | EMF1_ARATH Protein EMBRYONIC FLOWER 1                                   |
| 69. | Solyc11g071260 | Ubiquitin-conjugating enzyme E2                                     | capana11g000077 | PP6R3_HUMAN Serine/threonine-protein phosphatase 6 regulatory subunit 3 |

**Table S8. Annotation of genes in *Ty3* qtl region of Tomato and their conserved orthologs in pepper**

| <b>S.No</b> | <b>Tomato gene</b> | <b>Annotation in Tomato</b>                 | <b>Pepper ortholog</b> | <b>Annotation in Pepper</b>             |
|-------------|--------------------|---------------------------------------------|------------------------|-----------------------------------------|
| 1.          | Solyc06g051760     | Arginyl-tRNA--protein transferase 1         | Capana06g002469        | MYOB_DICDI Myosin IB heavy chain        |
| 2.          | Solyc06g051770     | Unknown Protein (AHRD V1)                   |                        |                                         |
| 3.          | Solyc06g051780     | Poly(A) RNA polymerase                      |                        |                                         |
| 4.          | Solyc06g051790     | Unknown Protein (AHRD V1)                   |                        |                                         |
| 5.          | Solyc06g051800     | Expansin                                    |                        |                                         |
| 6.          | Solyc06g051810     | X1 (Fragment) Region of unknown function XS |                        |                                         |
| 7.          | Solyc06g051820     | Myosin                                      |                        |                                         |
| 8.          | Solyc06g051830     | Potassium transporter 17                    |                        |                                         |
| 9.          | Solyc06g051840     | Ethylene responsive transcription factor 1a | Capana06g002704        | RING1_GOSHI E3 ubiquitin-protein ligase |
| 10.         | Solyc06g051850     | Inorganic phosphate transporter 6           | Capana06g002703        | -                                       |
| 11.         | Solyc06g051860     | Inorganic phosphate transporter 6           |                        |                                         |

|     |                    |                                        |  |  |
|-----|--------------------|----------------------------------------|--|--|
|     | 0                  |                                        |  |  |
| 12. | Solyc06g08476<br>0 | Cytochrome P450 monooxygenase CYP72A68 |  |  |
| 13. | Solyc06g08477<br>0 | Unknown Protein (AHRD V1)              |  |  |

**Table S9. Annotation of genes in *Ty4* qtl region of Tomato and their conserved orthologs in pepper**

| S.No | Tomato gene    | Annotation in Tomato                   | Pepper ortholog | Annotation in Pepper                                        |
|------|----------------|----------------------------------------|-----------------|-------------------------------------------------------------|
| 1.   | Solyc03g019930 | UPF0415 protein C7orf25 homolog        | capana03g001506 | RNG1L_ARATH E3 ubiquitin-protein ligase                     |
| 2.   | Solyc03g019920 | Harpin-induced protein-like (Fragment) | capana03g001509 | FB341_ARATH F-box protein                                   |
| 3.   | Solyc03g019910 | Unknown Protein (AHRD V1)              | capana03g001510 | -                                                           |
| 4.   | Solyc03g019900 | Serine/threonine-protein phosphatase   | capana03g001514 | Probable ADP-ribosylation factor GTPase-activating protein  |
| 5.   | Solyc03g019890 | Beta-galactosidase (                   | capana03g001517 |                                                             |
| 6.   | Solyc03g019880 | UPF0426 protein                        | capana03g001520 |                                                             |
| 7.   | Solyc03g019870 | Cytochrome P450                        | capana03g001523 | TBCB_CAEEL Tubulin-specific chaperone B                     |
| 8.   | Solyc03g019860 | Unknown Protein (AHRD V1)              |                 |                                                             |
| 9.   | Solyc03g019850 | MAP kinase                             | capana03g001524 | YR106_MIMIV Uncharacterized protein                         |
| 10   | Solyc03g019840 | Plastid DNA-binding protein (          | capana03g001525 | NAC74_ORYSJ NAC domain-containing protein                   |
| 11   | Solyc03g019830 | Receptor like kinase%2C RLK            | capana03g001526 | HDG11_ARATH Homeobox-leucine zipper protein                 |
| 12   | Solyc03g019820 | Aquaporin                              | capana03g001527 | CNG20_ARATH Probable cyclic nucleotide-gated ion channel 20 |
| 13   | Solyc03g019810 | Metallophosphoesterase                 | capana03g001528 | SPTC2_HUMAN Serine palmitoyltransferase                     |

|    |                |                                                             |                 |                                                                  |
|----|----------------|-------------------------------------------------------------|-----------------|------------------------------------------------------------------|
| 14 | Solyc03g019800 | Myb-like protein B                                          | capana03g001536 | DPOE2_CHICK DNA polymerase epsilon subunit                       |
| 15 | Solyc03g019790 | Alpha-galactosidase                                         | capana03g001537 | MYB44_ARATH Transcription factor MYB44                           |
| 16 | Solyc03g019780 | 40S ribosomal protein SA (eukaryotic/archaeal)              | capana03g001538 | AGO1A_ORYSJ Protein argonaute 1A                                 |
| 17 | Solyc03g019770 | Uncharacterized PH domain-containing protein                | capana03g001539 | SUS2_PEA Sucrose synthase                                        |
| 18 | Solyc03g019760 | ABC transporter G family member 11                          | capana03g001540 | DCOR_SOLLC Ornithine decarboxylase                               |
| 19 | Solyc03g019750 | Alpha-1 4-glucan-protein synthase                           | capana03g001546 | MYBG_DICDI Myb-like protein G                                    |
| 20 | Solyc03g019740 | Unknown Protein (AHRD V1)                                   | capana03g001547 | FBK6_ARATH Putative F-box/kelch-repeat protein                   |
| 21 | Solyc03g019730 | Sumo activating enzyme 1b                                   | capana03g001549 |                                                                  |
| 22 | Solyc03g019720 | Carnitine operon protein caiE                               | capana03g001552 |                                                                  |
| 23 | Solyc03g019710 | MADS-box transcription factor                               | capana03g001553 |                                                                  |
| 24 | Solyc03g019700 | Os02g0508100 protein (Fragment) (AHRD V1 ***- Q0E0Z9_ORYSJ) |                 |                                                                  |
| 25 | Solyc03g019690 | Kunitz-type protease inhibitor                              | capana03g001554 | PP206_ARATH Putative pentatricopeptide repeat-containing protein |
| 26 | Solyc03g019680 | CBS domain containing protein                               | capana06g000939 | MORC3_HUMAN MORC family CW-type zinc finger protein              |
| 27 | Solyc03g019670 | Phosphoesterase family protein                              |                 |                                                                  |
| 28 | Solyc03g019660 | Thylakoid lumenal 17.9 kDa protein%2C chloroplastic         |                 |                                                                  |
| 29 | Solyc03g019650 | Nodulin-like protein                                        |                 |                                                                  |
| 30 | Solyc03g019640 | Chaperone protein dnaJ 49                                   |                 |                                                                  |
| 31 | Solyc03g019630 | Chaperone protein dnaJ 3                                    |                 |                                                                  |
| 32 | Solyc03g110840 | Nuclear transcription factor Y subunit C-1                  | capana03g001462 | UMP8_ARATH Uncharacterized protein                               |
| 33 | Solyc03g110850 | Nuclear transcription factor Y subunit C-1                  |                 |                                                                  |
| 34 | Solyc03g110860 | Nuclear transcription factor Y subunit C-1                  | capana03g001463 | AGL5_ARATH Agamous-like MADS-box protein                         |
| 35 | Solyc03g110870 | Unknown Protein (AHRD V1)                                   |                 |                                                                  |



|    |                |                                                         |                 |                                                                       |
|----|----------------|---------------------------------------------------------|-----------------|-----------------------------------------------------------------------|
| 36 | Solyc03g110880 | DNA-directed RNA polymerase                             | capana03g001461 | SAE1B_ARATH SUMO-activating enzyme subunit 1B                         |
| 37 | Solyc03g110890 | Expressed protein (Fragment)                            | capana03g001460 |                                                                       |
| 38 | Solyc03g110900 | Katanin p60 ATPase-containing subunit A-like 1          | capana03g001459 | RGP3_ARATH UDP-arabinopyranose mutase 3                               |
| 39 | Solyc03g110910 | Histone acetyltransferase ELP3 family protein           | capana03g001458 | AB11G_ARATH ABC transporter G family member                           |
| 40 | Solyc03g110920 | Receptor expression-enhancing protein 5                 | capana03g001457 | YBR6_SCHPO Uncharacterized protein                                    |
| 41 | Solyc03g110930 | 30S ribosomal protein S21%2C chloroplastic (Fragment)   | capana03g001456 | RSSA_DAUCA 40S ribosomal protein SA                                   |
| 42 | Solyc03g110940 | Uncharacterized aarF domain-containing protein kinase 1 | capana03g001451 | AGAL_COFAR Alpha-galactosidase                                        |
| 43 | Solyc03g110950 | GRAS family transcription factor                        | capana03g001450 | DMTF1_HUMAN Cyclin-D-binding Myb-like transcription factor 1          |
| 44 | Solyc03g110960 | Nucleoside diphosphate kinase                           | capana03g001449 |                                                                       |
| 45 | Solyc03g110970 | GDP-mannose transporter                                 | capana03g001448 | TIP32_ARATH Probable aquaporin TIP3-2                                 |
| 46 | Solyc03g110980 | Unknown Protein (AHRD V1)                               | capana03g001447 | Y1680_ARATH Probable leucine-rich repeat receptor-like protein kinase |
| 47 | Solyc03g110990 | Unknown Protein (AHRD V1)                               |                 |                                                                       |
| 48 | Solyc03g111000 | Glyceraldehyde 3-phosphate dehydrogenase                | capana03g001445 |                                                                       |
| 49 | Solyc03g111010 | Glyceraldehyde-3-phosphate dehydrogenase                |                 |                                                                       |
| 50 | Solyc03g111020 | Unknown Protein (AHRD V1)                               |                 |                                                                       |
| 51 | Solyc03g111030 | Genomic DNA chromosome 5 P1 clone MXI22                 | capana03g001444 | M2K6_ARATH Mitogen-activated protein kinase kinase 6                  |
| 52 | Solyc03g111040 | Histidine amino acid transporter                        | capana03g001442 | C72B1_PINTA Abietadienol/abietadienal oxidase                         |
| 53 | Solyc03g111050 | Plastid RNA-binding protein                             | capana03g001397 | RPD2A_ARATH DNA-directed RNA polymerase D subunit 2a                  |
| 54 | Solyc03g111060 | 3-oxoacyl-reductase                                     | capana06g000949 | BOR2_ARATH Probable boron transporter 2                               |

|    |                |                                             |                 |                                                         |
|----|----------------|---------------------------------------------|-----------------|---------------------------------------------------------|
| 55 | Solyc03g111070 | 3-oxoacyl-reductase                         | capana03g001400 | NFYC4_ARATH Nuclear transcription factor Y_subunit C-4  |
| 56 | Solyc03g111080 | 3-oxoacyl- reductase                        |                 |                                                         |
| 57 | Solyc03g111090 | Bromodomain factor                          | capana03g001404 |                                                         |
| 58 | Solyc03g111100 | AtIII18x5-like protein (Fragment)           | capana03g001419 | IP23_SOLLC Proteinase inhibitor type-2 CEVI57           |
| 59 | Solyc03g111110 | Unknown Protein (AHRD V1)                   |                 |                                                         |
| 60 | Solyc03g111120 | Malate synthase                             | capana03g001420 | MIRA_RICDU Miraculin                                    |
| 61 | Solyc03g111130 | Malate synthase                             |                 |                                                         |
| 62 | Solyc03g111140 | Malate synthase                             |                 |                                                         |
| 63 | Solyc03g111150 | Extracellular ligand-gated ion channel      | capana03g001422 |                                                         |
| 64 | Solyc03g111160 | Dual-specificity protein-like phosphatase 3 |                 |                                                         |
| 65 | Solyc03g111170 | 4-coumarate-coa ligase                      | capana03g001424 | PP165_ARATH Pentatricopeptide repeat-containing protein |

**Table S10. Annotation of genes in *ty5* qtl region of Tomato and their conserved orthologs in pepper**

| S.No | Tomato gene    | Annotation in Tomato                                                 | Pepper ortholog | Annotation in Pepper                                               |
|------|----------------|----------------------------------------------------------------------|-----------------|--------------------------------------------------------------------|
| 1.   | Solyc04g008510 | UBX domain-containing protein                                        |                 |                                                                    |
| 2.   | Solyc04g008520 | Outer envelope protein (                                             | capana05g000831 | ARL8B_RAT ADP-ribosylation factor-like protein                     |
| 3.   | Solyc04g008530 | Ubiquitin carboxyl-terminal hydrolase family protein                 | capana05g000818 | HMGYA_SOYBN HMG-Y-related protein A                                |
| 4.   | Solyc04g008540 | Tobamovirus multiplication protein (Fragment)                        | capana05g000819 | XPC_MOUSE DNA repair protein complementing XP-C cells homolog      |
| 5.   | Solyc04g008550 | Zinc finger CCCH domain-containing protein 17                        | capana05g000820 | RL23_METCA 50S ribosomal protein L23                               |
| 6.   | Solyc04g008560 | Unknown Protein (AHRD V1)                                            | capana05g000823 | #N/A                                                               |
| 7.   | Solyc04g008570 | Pentatricopeptide repeat-containing protein                          | capana03g001301 | Pentatricopeptide repeat-containing protein                        |
| 8.   | Solyc04g008580 | Ankyrin repeat domain protein (                                      | capana05g000817 | #N/A                                                               |
| 9.   | Solyc04g008590 | Pyruvate dehydrogenase E1 component subunit beta                     | capana05g000815 | Probably inactive leucine-rich repeat receptor-like protein kinase |
| 10.  | Solyc04g008600 | Chromosome segregation in meiosis protein 3                          | capana05g000806 | #N/A                                                               |
| 11.  | Solyc04g008610 | Histone acetyltransferase                                            | capana03g001296 | BT1_ARATH BTB/POZ and TAZ domain-containing protein 1              |
| 12.  | Solyc04g008620 | Integral membrane single C2 domain protein                           | capana05g000800 | GGPPS_HEVBR Geranylgeranyl pyrophosphate synthase, chloroplastic   |
| 13.  | Solyc04g008630 | Autophagy-related protein 9                                          | capana05g000801 | FDL1_ARATH F-box/FBD/LRR-repeat protein                            |
| 14.  | Solyc04g008640 | Conserved oligomeric Golgi complex subunit 3                         |                 | #N/A                                                               |
| 15.  | Solyc04g008650 | Receptor like kinase%2C RLK                                          |                 | #N/A                                                               |
| 16.  | Solyc04g008660 | Arf-GAP with GTPase%2C ANK repeat and PH domain-containing protein 1 | capana05g000802 | #N/A                                                               |
| 17.  | Solyc04g008670 | Gibberellin 2-beta-dioxygenase 7                                     | capana03g001342 | KING1_ARATH SNF1-related protein kinase regulatory subunit gamma-1 |

|     |                |                                                               |                 |                                                                               |
|-----|----------------|---------------------------------------------------------------|-----------------|-------------------------------------------------------------------------------|
| 18. | Solyc04g008680 | Cell division cycle and apoptosis regulator protein 1 (       | capana05g000805 | GLYT4_ARATH Probable glycosyltransferase                                      |
| 19. | Solyc04g008690 | cDNA clone J013057D02 full insert sequence                    | capana05g000798 | GAI_SOLLC DELLA protein GAI                                                   |
| 20. | Solyc04g008700 | Pre-mRNA-processing factor 40 homolog A                       | capana05g000794 | RHIE_DICD3 Rhamnogalacturonate lyase                                          |
| 21. | Solyc04g008710 | Unknown Protein (AHRD V1)                                     | capana05g000793 | BPC1_ARATH Protein BASIC PENTACYSTEINE1                                       |
| 22. | Solyc04g008720 | WD-repeat protein                                             | capana03g001292 | AGO4B_ORYSJ Protein argonaute 4B                                              |
| 23. | Solyc04g008730 | Alpha-galactosidase 1                                         | capana05g000781 | IAR1_ARATH IAA-alanine resistance protein 1                                   |
| 24. | Solyc04g008740 | Pyruvate kinase                                               | capana05g000778 | CAP13_ARATH Putative clathrin assembly protein                                |
| 25. | Solyc04g008750 | Transcription elongation factor SPT4                          | capana05g000768 | Y1133_ARATH G-type lectin S-receptor-like serine/threonine-protein kinase     |
| 26. | Solyc04g008760 | Homoserine kinase                                             | capana05g000767 | PPR6_ARATH Pentatricopeptide repeat-containing protein                        |
| 27. | Solyc04g008770 | Mitochondrial intermembrane space import and assembly protein | capana05g000766 | MS1_ARATH PHD finger protein MALE STERILITY 1                                 |
| 28. | Solyc04g008780 | Dihydroflavonol 4-reductase family                            | capana05g000764 | BRL2_ARATH Serine/threonine-protein kinase BRI1-like 2                        |
| 29. | Solyc04g008790 | LOC563247 protein (Fragment)                                  | capana05g000760 | HAK17_ORYSJ Probable potassium transporter 17                                 |
| 30. | Solyc04g008800 | Unknown Protein (AHRD V1)                                     | capana05g000757 | MYBF_ARATH Putative Myb family transcription factor                           |
| 31. | Solyc04g008810 | 40S ribosomal protein S26                                     | capana05g000755 | OEP37_PEA Outer envelope pore protein 37, chloroplastic                       |
| 32. | Solyc04g008820 | HMG transcription factor (Fragment)                           | capana05g000754 | UBXN7_PONAB UBX domain-containing protein 7                                   |
| 33. | Solyc04g008830 | LRR receptor-like serine/threonine-protein kinase%2C RLP      | capana05g000753 | MGP_ARATH Zinc finger protein MAGPIE OS=Arabidopsis thaliana GN=MGP PE=1 SV=1 |
| 34. | Solyc04g008840 | ABI3-interacting protein 2                                    | capana05g000752 | NDUB7_ARATH NADH dehydrogenase [ubiquinone] 1 beta subcomplex subunit 7       |

|     |                |                                                            |                 |                                                         |
|-----|----------------|------------------------------------------------------------|-----------------|---------------------------------------------------------|
| 35. | Solyc04g008850 | Aspartic proteinase nepenthesin-1                          | capana05g000748 | PP379_ARATH Pentatricopeptide repeat-containing protein |
| 36. | Solyc04g008860 | Arginine N-methyltransferase family protein                | capana05g000747 | Y2215_ARATH Uncharacterized protein                     |
| 37. | Solyc04g008870 | MYB transcription factor                                   | capana05g000746 | Zinc finger CCCH domain-containing protein 17           |
| 38. | Solyc04g008880 | UDP-N-acetylmuramoyl-tripeptide--D-alanyl-D-alanine ligase |                 | #N/A                                                    |
| 39. | Solyc04g008890 | Splicing factor 3B subunit 5                               |                 | #N/A                                                    |
| 40. | Solyc04g008900 | Fgenesh protein 60                                         |                 | #N/A                                                    |
| 41. | Solyc04g008910 | Fgenesh protein 60                                         |                 | #N/A                                                    |
| 42. | Solyc04g008920 | Fgenesh protein 60                                         |                 | #N/A                                                    |
| 43. | Solyc04g008930 | FIP1                                                       |                 | #N/A                                                    |
| 44. | Solyc04g008940 | FIP1                                                       |                 | #N/A                                                    |
| 45. | Solyc04g008950 | FIP1                                                       |                 | #N/A                                                    |
| 46. | Solyc04g008960 | FIP1 (                                                     |                 | #N/A                                                    |
| 47. | Solyc04g008970 | FIP1                                                       |                 | #N/A                                                    |
| 48. | Solyc04g008980 | F-box/LRR-repeat protein                                   |                 | #N/A                                                    |
| 49. | Solyc04g008990 | Riboflavin biosynthesis protein RibF                       |                 | #N/A                                                    |
| 50. | Solyc04g009000 | Pentatricopeptide repeat-containing protein                |                 | #N/A                                                    |
| 51. | Solyc04g009010 | Isoprenylcysteine carboxyl methyltransferase               |                 | #N/A                                                    |
| 52. | Solyc04g009020 | Pre-mRNA-splicing factor clf1                              |                 | #N/A                                                    |
| 53. | Solyc04g009030 | Glyceraldehyde-3-phosphate dehydrogenase                   |                 | #N/A                                                    |
| 54. | Solyc04g009040 | Receptor like kinase%2C RLK                                |                 | #N/A                                                    |
| 55. | Solyc04g009050 | Os01g0498200 protein (Fragment)                            |                 | #N/A                                                    |
| 56. | Solyc04g009060 | CD2 antigen cytoplasmic tail-binding protein 2             |                 | #N/A                                                    |
| 57. | Solyc04g009070 | Nbs%2C resistance protein fragment                         |                 | #N/A                                                    |
| 58. | Solyc04g009080 | Nbs%2C resistance protein fragment                         |                 | #N/A                                                    |
| 59. | Solyc04g009090 | Nbs-lrr%2C resistance protein                              |                 | #N/A                                                    |
| 60. | Solyc04g009100 | Nbs%2C resistance protein fragment                         |                 | #N/A                                                    |
| 61. | Solyc04g009110 | Cc-nbs-lrr%2C resistance protein                           |                 | #N/A                                                    |

|     |                |                                                                |                 |                                                         |
|-----|----------------|----------------------------------------------------------------|-----------------|---------------------------------------------------------|
| 62. | Solyc04g009120 | Cc-nbs-lrr%2C resistance protein                               |                 | #N/A                                                    |
| 63. | Solyc04g009130 | Cc-nbs-lrr%2C resistance protein                               |                 | #N/A                                                    |
| 64. | Solyc04g009140 | Mitochondrial ribosomal protein L46                            |                 | #N/A                                                    |
| 65. | Solyc04g009150 | Cc-nbs-lrr%2C resistance protein                               |                 | #N/A                                                    |
| 66. | Solyc04g009160 | Unknown Protein (AHRD V1)                                      |                 | #N/A                                                    |
| 67. | Solyc04g009170 | RING finger protein 44                                         | capana03g001962 | WRK27_ARATH Probable WRKY transcription factor 27       |
| 68. | Solyc04g009180 | TCP family transcription factor                                | capana03g001963 | #N/A                                                    |
| 69. | Solyc04g009190 | WW domain-binding protein 2                                    | capana03g001964 | PP151_ARATH Pentatricopeptide repeat-containing protein |
| 70. | Solyc04g009200 | Glutamate-1-semialdehyde-2 1-aminomutase                       | capana03g001966 | DOF46_ARATH Dof zinc finger protein                     |
| 71. | Solyc04g009210 | Pentatricopeptide repeat-containing protein                    | capana03g001967 | MUT7_AEDAE Probable exonuclease mut-7 homolog           |
| 72. | Solyc04g009220 | Pentatricopeptide repeat-containing protein                    |                 | #N/A                                                    |
| 73. | Solyc04g009230 | Mitosis protein dim1                                           | capana03g001971 | ATXR6_ARATH Histone-lysine N-methyltransferase          |
| 74. | Solyc04g009240 | Cc-nbs-lrr%2C resistance protein                               |                 | #N/A                                                    |
| 75. | Solyc04g009250 | Cc-nbs-lrr%2C resistance protein                               |                 | #N/A                                                    |
| 76. | Solyc04g009260 | Cc-nbs-lrr%2C resistance protein                               |                 | #N/A                                                    |
| 77. | Solyc04g009270 | Cc-nbs%2C resistance protein fragment                          |                 | #N/A                                                    |
| 78. | Solyc04g009280 | IMP dehydrogenase/GMP reductase (AHRD V1<br>**-- B6SV42 MAIZE) |                 | #N/A                                                    |
| 79. | Solyc04g009290 | Cc-nbs-lrr%2C resistance protein                               |                 | #N/A                                                    |
| 80. | Solyc04g009300 | GTP-binding protein YqeH                                       |                 | #N/A                                                    |
| 81. | Solyc04g009310 | ATP-dependent Clp protease proteolytic subunit                 |                 | #N/A                                                    |
| 82. | Solyc04g009320 | Hsp70 nucleotide exchange factor fes1                          |                 | #N/A                                                    |
| 83. | Solyc04g009330 | Serine/threonine-protein kinase 12                             |                 | #N/A                                                    |
| 84. | Solyc04g009340 | U-box domain-containing protein 62                             |                 | #N/A                                                    |
| 85. | Solyc04g009350 | Histidinol-phosphate aminotransferase                          |                 | #N/A                                                    |
| 86. | Solyc04g009360 | WD-40 repeat family protein                                    |                 | #N/A                                                    |
| 87. | Solyc04g009370 | Homology to unknown gene                                       |                 | #N/A                                                    |

|      |                |                                                                    |                 |                                                                   |
|------|----------------|--------------------------------------------------------------------|-----------------|-------------------------------------------------------------------|
| 88.  | Solyc04g009380 | Palmitoyltransferase PFA4 Zinc finger%2C DHHC-type                 |                 | #N/A                                                              |
| 89.  | Solyc04g009390 | PHD-finger family protein expressed                                |                 | #N/A                                                              |
| 90.  | Solyc04g009400 | PHD-finger family protein expressed                                |                 | #N/A                                                              |
| 91.  | Solyc04g009410 | Proteasome subunit beta type                                       |                 | #N/A                                                              |
| 92.  | Solyc04g009420 | Photosystem II oxygen evolving complex protein PsbP                |                 | #N/A                                                              |
| 93.  | Solyc04g009430 | NAD-dependent                                                      |                 | #N/A                                                              |
| 94.  | Solyc04g009440 | NAC domain protein                                                 |                 | #N/A                                                              |
| 95.  | Solyc04g009450 | Ethylene-responsive transcription factor 4                         |                 | #N/A                                                              |
| 96.  | Solyc04g009460 | Unknown Protein                                                    |                 | #N/A                                                              |
| 97.  | Solyc04g009470 | CTV.22                                                             | capana05g000745 | #N/A                                                              |
| 98.  | Solyc04g009480 | Unknown Protein                                                    |                 | #N/A                                                              |
| 99.  | Solyc04g009490 | CTV.22                                                             | capana05g000743 | UBP12_ARATH Ubiquitin carboxyl-terminal hydrolase 12              |
| 100. | Solyc04g009500 | CTV.22                                                             |                 | #N/A                                                              |
| 101. | Solyc04g009510 | CCR4-NOT transcription complex subunit 4                           | capana05g000741 | GABP2_BOVIN GA-binding protein subunit beta-2                     |
| 102. | Solyc04g009520 | Nuclear transcription factor Y subunit B-3                         | capana05g000740 | ODPB_ZYGCR Pyruvate dehydrogenase E1 component subunit beta       |
| 103. | Solyc04g009530 | Glutathione S-transferase                                          | capana05g000733 | TIPIN_BOVIN TIMELESS-interacting protein                          |
| 104. | Solyc04g009540 | 50S ribosomal protein L10                                          | capana05g000711 | CCAR1_HUMAN Cell division cycle and apoptosis regulator protein 1 |
| 105. | Solyc04g009550 | FGFR1 oncogene partner                                             | capana05g000709 | G2OX8_ARATH Gibberellin 2-beta-dioxygenase 8                      |
| 106. | Solyc04g009560 | TBC1 domain family member 8B                                       | capana05g000708 | AGD4_ARATH ADP-ribosylation factor GTPase-activating protein AGD4 |
| 107. | Solyc04g009570 | Chromosome 15 contig 1 DNA sequence                                |                 | #N/A                                                              |
| 108. | Solyc04g009580 | CDP-diacylglycerol--glycerol-3-phosphate 3-phosphatidyltransferase | capana05g000706 | ATG9_DICDI Autophagy-related protein 9                            |
| 109. | Solyc04g009590 | Defensin protein                                                   |                 | #N/A                                                              |

|      |                |                                                                            |                 |                                                                              |
|------|----------------|----------------------------------------------------------------------------|-----------------|------------------------------------------------------------------------------|
| 110. | Solyc04g009600 | TRAF-type zinc finger family protein                                       | capana05g000705 | ESYT2_MOUSE Extended synaptotagmin-2                                         |
| 111. | Solyc04g009610 | Fasciclin-like domain-containing protein                                   | capana05g000696 | Histone acetyltransferase                                                    |
| 112. | Solyc04g009620 | Chorismate synthase                                                        | capana05g000685 | #N/A                                                                         |
| 113. | Solyc04g009630 | Alpha-glucosidase 1                                                        | capana05g000681 | TCRG1_MOUSE Transcription elongation regulator 1                             |
| 114. | Solyc04g009640 | Receptor like kinase%2C RLK                                                | capana05g000680 | #N/A                                                                         |
| 115. | Solyc04g009650 | Diphosphomevalonate decarboxylase-like protein                             |                 | #N/A                                                                         |
| 116. | Solyc04g009660 | Cc-nbs-lrr%2C resistance protein                                           | capana05g000653 | NEP2_NEPGR Aspartic proteinase nepenthesin-2                                 |
| 117. | Solyc04g009670 | Acyltransferase (Fragment)                                                 |                 | #N/A                                                                         |
| 118. | Solyc04g009680 | Acyltransferase (Fragment)                                                 |                 | #N/A                                                                         |
| 119. | Solyc04g009690 | Cc-nbs-lrr%2C resistance protein                                           |                 | #N/A                                                                         |
| 120. | Solyc04g009700 | Dual specificity phosphatase catalytic domain containing protein expressed | capana05g000678 | KTNB1_ARATH Katanin p80 WD40 repeat-containing subunit B1 homolog 1          |
| 121. | Solyc04g009710 | Ferredoxin                                                                 | capana05g000672 | AGAL_COFAR Alpha-galactosidase                                               |
| 122. | Solyc04g009720 | Pentatricopeptide repeat-containing protein                                | capana05g000670 | KPYC_SOLTU Pyruvate kinase, cytosolic isozyme                                |
| 123. | Solyc04g009730 | Pentatricopeptide repeat-containing protein                                | capana12g002230 | MVD1_DICDI Diphosphomevalonate decarboxylase                                 |
| 124. | Solyc04g009740 | Exocyst complex protein EXO70                                              | capana05g000669 | SPT42_ARATH Transcription elongation factor SPT4 homolog                     |
| 125. | Solyc04g009750 | Unknown Protein (AHRD V1)                                                  |                 | #N/A                                                                         |
| 126. | Solyc04g009760 | AT5G22070 protein (Fragment)                                               | capana05g000668 | KHSE_PROVI Homoserine kinase                                                 |
| 127. | Solyc04g009770 | DNAJ chaperone                                                             | capana05g000666 | MIA40_USTMA Mitochondrial intermembrane space import and assembly protein 40 |
| 128. | Solyc04g009780 | RING finger protein 13                                                     | capana05g000665 | DFRA_MALDO Bifunctional dihydroflavonol 4-reductase/flavanone 4-reductase    |
| 129. | Solyc04g009790 | Multidrug resistance protein mdtK                                          |                 | #N/A                                                                         |
| 130. | Solyc04g009800 | Calcium-dependent protein kinase 2                                         | capana05g000652 | ANM6_ARATH Probable protein arginine                                         |



|      |                |                                                        |                 | N-methyltransferase 6                                            |
|------|----------------|--------------------------------------------------------|-----------------|------------------------------------------------------------------|
| 131. | Solyc04g009810 | Pelota homolog                                         | capana05g000663 | #N/A                                                             |
| 132. | Solyc04g009820 | Calcium-responsive transactivator                      | capana05g000659 | RS261_ARATH 40S ribosomal protein S26-1                          |
| 133. | Solyc04g009830 | Stress responsive gene 6 protein Srg6                  | capana05g000658 | HMGB7_ARATH High mobility group B protein 7                      |
| 134. | Solyc04g009840 | C-Myc-binding protein                                  | capana05g000654 | FRIGI_ARATH Protein FRIGIDA                                      |
| 135. | Solyc04g009850 | 1-aminocyclopropane-1-carboxylate oxidase-like protein |                 | #N/A                                                             |
| 136. | Solyc04g009860 | 1-aminocyclopropane-1-carboxylate oxidase-like protein |                 | #N/A                                                             |
| 137. | Solyc04g009870 | Unknown Protein                                        |                 | #N/A                                                             |
| 138. | Solyc04g009880 | Unknown Protein                                        |                 | #N/A                                                             |
| 139. | Solyc04g009890 | Unknown Protein                                        |                 | #N/A                                                             |
| 140. | Solyc04g009900 | Calcium-dependent protein kinase 2                     |                 | #N/A                                                             |
| 141. | Solyc04g009910 | Calcium-dependent protein kinase 2                     |                 | #N/A                                                             |
| 142. | Solyc04g009920 | Glycogenin-like protein                                | capana05g000644 | MY1R1_SOLTU Transcription factor MYB1R1                          |
| 143. | Solyc04g009930 | Cytochrome P450                                        | capana05g000548 | #N/A                                                             |
| 144. | Solyc04g009940 | Heat shock protein binding protein                     |                 | #N/A                                                             |
| 145. | Solyc04g009950 | Pre-mRNA splicing factor                               | capana05g000547 | #N/A                                                             |
| 146. | Solyc04g009960 | L-allo-threonine aldolase                              | capana05g000546 | NOT4_YEAST General negative regulator of transcription subunit 4 |
| 147. | Solyc04g009970 | Zinc ion binding protein                               | capana05g000545 | NFYB8_ARATH Nuclear transcription factor Y subunit B-8           |
| 148. | Solyc04g009980 | Light-dependent short hypocotyls 1                     | capana05g000544 | IN21B_ORYSJ Protein IN2-1 homolog B                              |
| 149. | Solyc04g009990 | Lysine-specific demethylase 5A                         | capana05g000543 | RK10_TOBAC 50S ribosomal protein L10, chloroplastic              |
| 150. | Solyc04g010000 | RNA-binding protein                                    | capana05g000542 | FR1OP_HUMAN FGFR1 oncogene partner                               |
| 151. | Solyc04g010010 | Thioredoxin-like protein 1                             |                 | #N/A                                                             |
| 152. | Solyc04g010020 | RNA-binding protein                                    |                 | #N/A                                                             |

|      |                |                                                                 |                 |                                                                               |
|------|----------------|-----------------------------------------------------------------|-----------------|-------------------------------------------------------------------------------|
| 153. | Solyc04g010030 | Thioredoxin-like protein 1                                      |                 | #N/A                                                                          |
| 154. | Solyc04g010040 | RNA-binding protein                                             |                 | #N/A                                                                          |
| 155. | Solyc04g010050 | Pentatricopeptide repeat-containing protein                     | capana05g000541 | GYP2_EMENI Putative GTPase-activating protein AN11010                         |
| 156. | Solyc04g010060 | Pentatricopeptide repeat-containing protein                     |                 | #N/A                                                                          |
| 157. | Solyc04g010070 | Protein phosphatase 2A regulatory subunit B%26apos-like protein | capana05g000539 | PGSA_SODGM CDP-diacylglycerol--glycerol-3-phosphate 3-phosphatidyltransferase |
| 158. | Solyc04g010080 | ATP-binding domain-containing protein 4                         | capana05g000538 | #N/A                                                                          |
| 159. | Solyc04g010090 | Transcription initiation factor TFIID subunit 9B                | capana05g000533 | #N/A                                                                          |
| 160. | Solyc04g010100 | 50S ribosomal protein L33                                       |                 | #N/A                                                                          |
| 161. | Solyc04g010110 | Anthocyanidin 3-O-glucosyltransferase                           | capana05g000531 | AROC2_SOLLC Chorismate synthase 2, chloroplastic                              |
| 162. | Solyc04g010120 | Macrophage erythroblast attacher                                | capana05g000518 | AGLU_SPIOL Alpha-glucosidase                                                  |
| 163. | Solyc04g010130 | Unknown Protein (AHRD V1)                                       | capana05g000517 | Y3475_ARATH Probable LRR receptor-like serine/threonine-protein kinase        |
| 164. | Solyc04g010140 | Unknown Protein (AHRD V1)                                       |                 | #N/A                                                                          |
| 165. | Solyc04g010150 | Unknown Protein (AHRD V1)                                       |                 | #N/A                                                                          |
| 166. | Solyc04g010160 | Unknown Protein (AHRD V1)                                       |                 | #N/A                                                                          |
| 167. | Solyc04g010180 | Unknown Protein (AHRD V1)                                       | capana05g000516 | Uncharacterized protein ynbD                                                  |
| 168. | Solyc04g010190 | Immunophilin-like                                               | capana05g000515 | FER6_MAIZE Ferredoxin-6, chloroplastic                                        |
| 169. | Solyc04g010200 | ABC transporter G family member 6                               | capana05g000514 | PP365_ARATH Pentatricopeptide repeat-containing protein                       |
| 170. | Solyc04g010210 | ABC transporter G family member 1                               |                 | #N/A                                                                          |
| 171. | Solyc04g010220 | Unknown Protein (AHRD V1)                                       | capana05g000513 | EXOC7_RAT Exocyst complex component 7                                         |
| 172. | Solyc04g010230 | Pectate lyase family protein                                    | capana05g000508 | #N/A                                                                          |
| 173. | Solyc04g010240 | 60S ribosomal protein L35                                       | capana05g000506 | DNJH2_ALLPO DnaJ protein homolog 2                                            |
| 174. | Solyc04g010250 | Lipase-like protein                                             | capana05g000503 | ATL71_ARATH Putative RING-H2 finger protein                                   |
| 175. | Solyc04g010260 | Pre-mRNA-splicing factor RSE1                                   | capana05g000502 | CDPK1_ARATH Calcium-dependent                                                 |

|      |                |                                                                       |                 |                                                                    |
|------|----------------|-----------------------------------------------------------------------|-----------------|--------------------------------------------------------------------|
|      |                |                                                                       |                 | protein kinase 1                                                   |
| 176. | Solyc04g010270 | Disease resistance response/ dirigent-like protein                    | capana05g000501 | PELO_DROME Protein pelota                                          |
| 177. | Solyc04g010280 | Unknown Protein (AHRD V1)                                             |                 | #N/A                                                               |
| 178. | Solyc04g010290 | Beta-1-3-galactosyl-o-glycosyl-glycoprotein                           | capana05g000500 | CREST_XENLA Calcium-responsive transactivator 1                    |
| 179. | Solyc04g010300 | Unknown Protein (AHRD V1)                                             | capana05g000499 | VPS72_BOVIN Vacuolar protein sorting-associated protein 72 homolog |
| 180. | Solyc04g010310 | Uncharacterized ABC transporter ATP-binding protein/permease C9B6.09c |                 | #N/A                                                               |
| 181. | Solyc04g010320 | Cytochrome P450                                                       | capana05g000498 | ZOG_PHALU Zeatin O-glucosyltransferase                             |
| 182. | Solyc04g010330 | Auxin-regulated protein                                               |                 | #N/A                                                               |
| 183. | Solyc04g011330 | Unknown Protein                                                       |                 | #N/A                                                               |
| 184. | Solyc04g011340 | Nodulin-like protein                                                  | capana05g000461 | R1B16_SOLDE Putative late blight resistance protein homolog        |
| 185. | Solyc04g011350 | 2-oxoglutarate dehydrogenase E1 component                             | capana05g000457 | PPCK1_ARATH Phosphoenolpyruvate carboxylase kinase 1               |
| 186. | Solyc04g011360 | Ras-related protein Rab-8A                                            | capana05g000409 | XYLT_CIOSA Xylosyltransferase                                      |
| 187. | Solyc04g011370 | Actin-depolymerizing factor 2                                         | capana05g000408 | AB20B_ARATH ABC transporter B family member 20                     |
| 188. | Solyc04g011380 | Binding protein                                                       | capana05g000407 | C89A9_ARATH Cytochrome P450 89A9                                   |
| 189. | Solyc04g011390 | Histone H4                                                            |                 | #N/A                                                               |
| 190. | Solyc04g011400 | UDP-glucose 4-epimerase                                               | capana05g000404 | FBK50_ARATH F-box/kelch-repeat protein                             |
| 191. | Solyc04g011420 | UPF0497 membrane protein 2                                            | capana05g000401 | 5NG4_PINTA Auxin-induced protein 5NG4                              |
| 192. | Solyc04g011430 | Ubiquitin-conjugating enzyme 13 E2                                    | capana05g000399 | ODO1_DICDI 2-oxoglutarate dehydrogenase, mitochondrial             |
| 193. | Solyc04g011440 | heat shock protein                                                    |                 | #N/A                                                               |
| 194. | Solyc04g011450 | Heat shock cognate protein 2                                          |                 | #N/A                                                               |
| 195. | Solyc04g011460 | SLT1 protein                                                          | capana05g000398 | ELP1_RAT Elongator complex protein 1                               |
| 196. | Solyc04g011470 | Unknown Protein (AHRD V1)                                             | capana05g000396 | SYM_SYNY3 Methionine--tRNA ligase                                  |
| 197. | Solyc04g011480 | UPF0497 membrane protein 17                                           | capana05g000397 | #N/A                                                               |

|      |                |                                                                     |                 |                                                          |
|------|----------------|---------------------------------------------------------------------|-----------------|----------------------------------------------------------|
| 198. | Solyc04g011490 | UPF0497 membrane protein 17                                         |                 | #N/A                                                     |
| 199. | Solyc04g011500 | Actin 4                                                             | capana05g000395 | UXS1_HUMAN UDP-glucuronic acid decarboxylase 1           |
| 200. | Solyc04g011510 | Triosephosphate isomerase                                           | capana05g000394 | YN02_CAEEL CRAL-TRIO domain-containing protein T23G5.2   |
| 201. | Solyc04g011520 | Serine/threonine kinase-like protein ABC1063                        | capana05g000393 | CSPLI_POPTR CASP-like protein POPTRDRAFT_822486          |
| 202. | Solyc04g011530 | Os04g0129600 protein (Fragment)                                     | capana05g000392 | UBC7_ARATH Ubiquitin-conjugating enzyme E2 7             |
| 203. | Solyc04g011540 | Elicitor-responsive protein 1                                       |                 | #N/A                                                     |
| 204. | Solyc04g011550 | Unknown Protein                                                     | capana05g000391 | PGTB1_RAT Geranylgeranyl transferase type-1 subunit beta |
| 205. | Solyc04g011560 | Heterogeneous nuclear ribonucleoprotein A3-like protein 2           | capana05g000390 | DOF36_ARATH Dof zinc finger protein DOF3.6               |
| 206. | Solyc04g011570 | Zinc finger C3HC4 type family protein                               | capana05g000388 | KIN17_MOUSE DNA/RNA-binding protein KIN17                |
| 207. | Solyc04g011580 | mRNA binding protein Pumilio 2                                      | capana05g000387 | TECR_DICDI Trans-2,3-enoyl-CoA reductase                 |
| 208. | Solyc04g011590 | Histidine amino acid transporter                                    | capana05g000386 | ACT3_SOLTU Actin-58                                      |
| 209. | Solyc04g011600 | ER glycerol-phosphate acyltransferase                               | capana05g000385 | ALG5_HUMAN Dolichyl-phosphate beta-glucosyltransferase   |
| 210. | Solyc04g011610 | RING finger protein 13                                              | capana05g000384 | #N/A                                                     |
| 211. | Solyc04g011620 | FK506-binding protein 5(PEPTIDYL-PROLYL CIS-TRANS ISOMERASE)        |                 | #N/A                                                     |
| 212. | Solyc04g011630 | GRAS family transcription factor                                    | capana05g000382 | PSF2_ARATH DNA replication complex GINS protein PSF2     |
| 213. | Solyc04g011640 | Unknown Protein (AHRD V1)                                           |                 | #N/A                                                     |
| 214. | Solyc04g011650 | Telomere repeat-binding protein 4                                   | capana05g000383 | E13B_WHEAT Glucan endo-1,3-beta-glucosidase              |
| 215. | Solyc04g011660 | Ulp1 protease family C-terminal catalytic domain containing protein |                 | #N/A                                                     |
| 216. | Solyc04g011670 | BZIP transcription factor                                           | capana05g000379 | #N/A                                                     |

|      |                |                                                               |                 |                                                  |
|------|----------------|---------------------------------------------------------------|-----------------|--------------------------------------------------|
| 217. | Solyc04g011680 | Cytochrome P450                                               |                 | #N/A                                             |
| 218. | Solyc04g011690 | Cytochrome P450                                               |                 | #N/A                                             |
| 219. | Solyc04g011700 | Mitochondrial transcription termination factor family protein | capana05g000378 | TRP4_ARATH Telomere repeat-binding protein 4     |
| 220. | Solyc04g011710 | Unknown Protein (AHRD V1)                                     |                 | #N/A                                             |
| 221. | Solyc04g011720 | Glucan endo-1 3-beta-glucosidase 5                            | capana05g000374 | GAT15_ARATH GATA transcription factor 15         |
| 222. | Solyc04g011730 | Glucan endo-1 3-beta-glucosidase 5                            |                 | #N/A                                             |
| 223. | Solyc04g011740 | Unknown Protein (AHRD V1)                                     | capana05g000373 | ARR2_ARATH Two-component response regulator ARR2 |
| 224. | Solyc04g011750 | Unknown Protein (AHRD V1)                                     |                 | #N/A                                             |
| 225. | Solyc04g011760 | Unknown Protein (AHRD V1)                                     |                 | #N/A                                             |
| 226. | Solyc04g011770 | Unknown Protein (AHRD V1)                                     |                 | #N/A                                             |
| 227. | Solyc04g011780 | Glutaredoxin                                                  | capana05g000372 | PRS2_SOLTU Pathogenesis-related protein STH-2    |
| 228. | Solyc04g011790 | Glutaredoxin                                                  |                 | #N/A                                             |
| 229. | Solyc04g011800 | Glutaredoxin                                                  |                 | #N/A                                             |
| 230. | Solyc04g011810 | Glutaredoxin                                                  |                 | #N/A                                             |
| 231. | Solyc04g011820 | Glutaredoxin                                                  |                 | #N/A                                             |
| 232. | Solyc04g011830 | Glutaredoxin                                                  |                 | #N/A                                             |
| 233. | Solyc04g011840 | Glutaredoxin                                                  |                 | #N/A                                             |
| 234. | Solyc04g011850 | Glutaredoxin                                                  |                 | #N/A                                             |
| 235. | Solyc04g011860 | Glutaredoxin                                                  |                 | #N/A                                             |
| 236. | Solyc04g011870 | Glutaredoxin                                                  |                 | #N/A                                             |
| 237. | Solyc04g011880 | Glutaredoxin                                                  |                 | #N/A                                             |
| 238. | Solyc04g011890 | Nbs%2C resistance protein fragment                            |                 | #N/A                                             |
| 239. | Solyc04g011900 | Os04g0639300 protein                                          |                 | #N/A                                             |
| 240. | Solyc04g011910 | Os03g0169900 protein                                          |                 | #N/A                                             |
| 241. | Solyc04g011920 | Cytochrome P450                                               |                 | #N/A                                             |
| 242. | Solyc04g011940 | Cytochrome P450                                               |                 | #N/A                                             |

|      |                |                                                 |  |      |
|------|----------------|-------------------------------------------------|--|------|
| 243. | Solyc04g011950 | Unknown Protein (AHRD V1)                       |  | #N/A |
| 244. | Solyc04g011960 | Cc-nbs- <i>lrr</i> %2C resistance protein       |  | #N/A |
| 245. | Solyc04g011970 | Gag-Pol polyprotein                             |  | #N/A |
| 246. | Solyc04g011980 | Cc-nbs- <i>lrr</i> %2C resistance protein       |  | #N/A |
| 247. | Solyc04g011990 | Cc-nbs- <i>lrr</i> %2C resistance protein       |  | #N/A |
| 248. | Solyc04g012000 | Nbs%2C resistance protein fragment              |  | #N/A |
| 249. | Solyc04g012010 | Cc-nbs- <i>lrr</i> %2C resistance protein       |  | #N/A |
| 250. | Solyc04g012020 | Hydroxycinnamoyl CoA quinate transferase        |  | #N/A |
| 251. | Solyc04g012030 | Palmitoyltransferase PFA4                       |  | #N/A |
| 252. | Solyc04g012040 | 26S proteasome non-ATPase regulatory subunit 12 |  | #N/A |
| 253. | Solyc04g012050 | Ethylene responsive transcription factor 2a     |  | #N/A |
| 254. | Solyc04g012060 | Ribonucleoside-diphosphate                      |  | #N/A |
| 255. | Solyc04g012070 | Nodulin family protein                          |  | #N/A |
| 256. | Solyc04g012080 | Pentatricopeptide repeat-containing protein     |  | #N/A |
| 257. | Solyc04g012090 | Receptor like kinase%2C RLK                     |  | #N/A |
| 258. | Solyc04g012100 | Receptor like kinase%2C RLK                     |  | #N/A |
| 259. | Solyc04g012110 | Receptor like kinase%2C RLK                     |  | #N/A |
| 260. | Solyc04g012120 | 14-3-3 protein beta/alpha-1                     |  | #N/A |
| 261. | Solyc04g012130 | Gag-pol polyprotein                             |  | #N/A |
| 262. | Solyc04g012140 | Unknown Protein (AHRD V1)                       |  | #N/A |
| 263. | Solyc04g012150 | Unknown Protein (AHRD V1)                       |  | #N/A |
| 264. | Solyc04g012160 | Serine-threonine protein kinase                 |  | #N/A |
| 265. | Solyc04g012170 | Kinase family protein                           |  | #N/A |
| 266. | Solyc04g012180 | Ras-related protein Rab-25                      |  | #N/A |
| 267. | Solyc04g012190 | Receptor like kinase%2C RLK                     |  | #N/A |
| 268. | Solyc04g012200 | Unknown Protein (AHRD V1)                       |  | #N/A |
| 269. | Solyc04g013200 | Unknown Protein                                 |  | #N/A |
| 270. | Solyc04g014200 | Receptor kinase-like protein                    |  | #N/A |
| 271. | Solyc04g014210 | ATP dependent RNA helicase                      |  | #N/A |

|      |                |                                                                                |                 |                                                                 |
|------|----------------|--------------------------------------------------------------------------------|-----------------|-----------------------------------------------------------------|
| 272. | Solyc04g014220 | RING finger protein                                                            |                 | #N/A                                                            |
| 273. | Solyc04g014230 | Plant-specific domain TIGR01570 family protein                                 |                 | #N/A                                                            |
| 274. | Solyc04g014240 | Unknown Protein (AHRD V1)                                                      |                 | #N/A                                                            |
| 275. | Solyc04g014250 | FIP1 (AHRD V1 **-- B6SNS7_MAIZE)%3B contains Interpro domain(s) IPR004182 GRAM |                 | #N/A                                                            |
| 276. | Solyc04g014260 | Zinc finger-homeodomain protein 1                                              |                 | #N/A                                                            |
| 277. | Solyc04g014270 | Phosphofructokinase family protein                                             |                 | #N/A                                                            |
| 278. | Solyc04g014280 | Unknown Protein                                                                | capana05g000367 | ACD10_MOUSE Acyl-CoA dehydrogenase family member 10 SV=1        |
| 279. | Solyc04g014290 | Unknown Protein                                                                |                 | #N/A                                                            |
| 280. | Solyc04g014300 | Unknown Protein                                                                |                 | #N/A                                                            |
| 281. | Solyc04g014310 | Unknown Protein                                                                |                 | #N/A                                                            |
| 282. | Solyc04g014320 | Unknown Protein                                                                |                 | #N/A                                                            |
| 283. | Solyc04g014330 | Unknown Protein                                                                |                 | #N/A                                                            |
| 284. | Solyc04g014340 | Unknown Protein                                                                |                 | #N/A                                                            |
| 285. | Solyc04g014350 | Unknown Protein                                                                |                 | #N/A                                                            |
| 286. | Solyc04g014360 | Transcription factor SPATULA                                                   | capana05g000366 | PME28_ARATH Putative pectinesterase/pectinesterase inhibitor 28 |
| 287. | Solyc04g014370 | Tyrosine phosphatase-like                                                      | capana05g000365 | HYES_PIG Epoxide hydrolase 2                                    |
| 288. | Solyc04g014380 | Kinase interacting protein 1                                                   | capana05g000364 | Ras-related protein RABE1c                                      |
| 289. | Solyc04g014390 | Mitochondrial ribosomal protein L43                                            |                 | #N/A                                                            |
| 290. | Solyc04g014400 | LRR receptor-like serine/threonine-protein kinase%2C RLP                       |                 | #N/A                                                            |
| 291. | Solyc04g014410 | Serine/threonine protein kinase-like                                           |                 | #N/A                                                            |
| 292. | Solyc04g014420 | Receptor expression-enhancing protein 5                                        |                 | #N/A                                                            |
| 293. | Solyc04g014430 | Rhamnogalacturonate lyase                                                      |                 | #N/A                                                            |
| 294. | Solyc04g014440 | LG127/30 like gene                                                             |                 | #N/A                                                            |
| 295. | Solyc04g014450 | Rhamnogalacturonate lyase                                                      |                 | #N/A                                                            |
| 296. | Solyc04g014460 | RNA binding protein                                                            | capana05g000363 | ADF2_PETHY Actin-depolymerizing factor                          |

|      |                |                                                          |                 |                                                 |
|------|----------------|----------------------------------------------------------|-----------------|-------------------------------------------------|
|      |                |                                                          |                 | 2                                               |
| 297. | Solyc04g014470 | MYB transcription factor                                 | capana05g000361 | #N/A                                            |
| 298. | Solyc04g014480 | class I heat shock protein 3                             | capana05g000358 | UXS1_HUMAN UDP-glucuronic acid decarboxylase 1  |
| 299. | Solyc04g014490 | Erwinia induced protein 2                                | capana05g000356 | CSPLI_POPTR CASP-like protein POPTRDRAFT_822486 |
| 300. | Solyc04g014500 | Diphosphoinositol polyphosphate phosphohydrolase         | capana05g000355 | UBC7_ARATH Ubiquitin-conjugating enzyme E2 7    |
| 301. | Solyc04g014510 | Glutamine synthetase                                     | capana05g000354 | #N/A                                            |
| 302. | Solyc04g014520 | Plant viral-response family protein                      |                 | #N/A                                            |
| 303. | Solyc04g014530 | Ethylene responsive transcription factor 1a              | capana05g000351 | PIMP1_CAPAN CASP-like protein PIMP1             |
| 304. | Solyc04g014540 | Zinc finger protein 7                                    | capana05g000349 | PIMP1_CAPAN CASP-like protein PIMP1             |
| 305. | Solyc04g014550 | Targeting protein for Xklp2 containing protein expressed |                 | #N/A                                            |
| 306. | Solyc04g014560 | Pre-mRNA-splicing factor 38B                             | capana05g000347 | ACT11_SOLTU Actin-97                            |
